# Supplementary material
Source: HighWire-hosted journal article supplement (http://thorax.bmjjournals.com/highwire/filestream/174093/field_highwire_adjunct_files/0/633259webonlyapp1.pdf)
Supplement: 633259webonlyapp1.pdf [file 633259webonlyapp1.pdf]

## **Primary determinants of ischaemic stroke/brain abscess risks are independent of severity of pulmonary arteriovenous malformations in HHT**

C L Shovlin, J E Jackson, K B Bamford, I H Jenkins, A R Benjamin, H Ramadan, E Kulinskaya

### **LEGENDS TO ONLINE SUPPLEMENTARY FIGURES:**

#### **Figure S1: Effect of PAVM severity:**

A) Brain abscess and B) ischaemic stroke rates stratified by i) oxygen saturation standing SaO<sub>2</sub> and ii) size of largest PAVM feeding artery, severity increasing left-to-right: i) interquartile ranges: Q<sub>1</sub>:59-88; Q<sub>2</sub>:88-93; Q<sub>3</sub>:93-96; Q<sub>4</sub>:96-100%, ii) Q<sub>1</sub>:0-3; Q<sub>2</sub>:3-5; Q<sub>3</sub>:5-6.5; Q<sub>4</sub>:6.5-12mm. Error bars: standard error of the mean.

#### **Figure S2: Anderson Gill proportional hazards models**

(A) Proportional survival until first ischaemic stroke: overall  $r^2 = 0.051$ , Wald test  $p=4.7 \times 10^{-5}$ , Robust score  $p=2.00 \times 10^{-2}$  (**for comparison, also presented in the text**).

(B) Proportional survival until first brain abscess: overall  $r^2 = 0.017$ , Wald test  $p=6.3 \times 10^{-3}$ , Robust score  $p=9.50 \times 10^{-3}$ .

#### **Figure S3: Presentation pattern analyses**

A) Pretreatment SaO<sub>2</sub>; B) Age at PAVM diagnosis; C) Interval between PAVM diagnosis and treatment (**for comparison, also presented in the text**). RS: PAVM-related respiratory symptoms (dyspnoea and haemoptysis); Ix: incidental investigations; CNS: post stroke/abscess, HHT: via HHT screening programme. *P* values (ANOVA, Bonferroni post test corrections): \*\*\* $p < 0.001$ ; \*\* $p < 0.01$ ; \* $p < 0.05$ ; ns:  $p > 0.05$ .

## SUPPLEMENTARY TABLES

**Table S1 : Univariate associations of non-PAVM variables with brain abscess**

|                                   | N with/<br>without<br>abscess | Event             | Event-free group  | P value* |
|-----------------------------------|-------------------------------|-------------------|-------------------|----------|
| <b>Non-PAVM variables</b>         |                               |                   |                   |          |
| Gender, No. (%), % female         | 28/191                        | 11 (39.3)         | 130 (67.7)        | 0.0054*  |
| Hb, median (Q1, Q3), g/dl         | 27/186                        | 15.1 (13.0, 16.4) | 14.5 (12.8, 15.8) | 0.35     |
| Iron use, No. (%), %              | 28/175                        | 12 (42.9)         | 61 (34.9)         | 0.41     |
| Hormones, No. (%), %              | 22/180                        | 2 (9.1)           | 37 (20.6)         | 0.26     |
| Tranexamic acid, No. (%), %       | 26/187                        | 1 (3.9)           | 7 (3.7)           | 0.99     |
| Migraine, No. (%), %              | 28/189                        | 8 (28.6)          | 82 (43.4)         | 0.16     |
| Smoker§, No. (%), %               | 28/189                        | 13 (46.4)         | 88 (46.6)         | 0.99     |
| Hypertension, No. (%), %          | 28/189                        | 3 (10.7)          | 33 (17.5)         | 0.59     |
| Hypercholesterolaemia, No. (%), % | 28/191                        | 0 (0)             | 4 (2.1)           | 0.09     |
| Diabetes, No. (%), %              | 28/188                        | 0 (0)             | 7 (3.7)           | 0.99     |
| Cardiac disease, No. (%), %       | 28/191                        | 3 (10.7)          | 6 (3.2)           | 0.11     |
| Atrial fibrillation, No. (%), %   | 27/188                        | 1 (3.7)           | 6 (3.2)           | 0.99     |
| FVIII:Ag, median (Q1, Q3), iu/l   | 17/90                         | 1.85 (1.6, 3.0)   | 1.80 (1.52, 2.22) | 0.44     |
| PAP mean, median (Q1, Q3), mmHg   | 20/130                        | 12.5 (10, 17)     | 13 (10.5, 16.0)   | 0.81     |
| DVT/PE, No. (%), %                | 27/152                        | 6 (22.2)          | 10 (6.8)          | 0.0186*  |

Legend: N = number of cases with/without abscess for which variable was measured. † more common in non-HHT patients ( $p < 0.0001$ , Fisher's exact test 2 sided  $p$  value). ‡ f.a.d. feeding artery diameter.

**Table S2: Anderson Gill models for brain abscess**

|                               | N   | df | R <sup>2</sup> | Wald test P value    | Robust score P value  | Hazard ratio for variable (95% CI) | P value for variable in model |
|-------------------------------|-----|----|----------------|----------------------|-----------------------|------------------------------------|-------------------------------|
| <b>Model 1 (pre emb)</b>      | 217 | 2  | 0.047          | $1.2 \times 10^{-3}$ | $1.76 \times 10^{-2}$ |                                    |                               |
| Gender (male)                 |     |    |                |                      |                       | 3.61 (1.58, 8.25)                  | $2.4 \times 10^{-3}$          |
| DVT                           |     |    |                |                      |                       | 3.35 (1.32, 8.50)                  | 0.011                         |
| <b>Model 2 (pre+post emb)</b> | 392 | 1  | 0.017          | $6.3 \times 10^{-3}$ | $9.50 \times 10^{-3}$ |                                    |                               |
| Gender (male)                 |     |    |                |                      |                       | 3.49 (1.43, 8.33)                  | $6.3 \times 10^{-3}$          |
| <b>Model 3 (pre emb)</b>      | 316 | 3  | 0.03           | 0.015                | 0.029                 |                                    |                               |
| Gender (male)                 |     |    |                |                      |                       | 4.55 (1.64, 12.5)                  | $3.63 \times 10^{-3}$         |

|                      |  |  |  |  |  |                   |       |
|----------------------|--|--|--|--|--|-------------------|-------|
| SaO <sub>2</sub> , % |  |  |  |  |  | 0.95 (0.89, 1.00) | 0.058 |
| Largest PAVM f.a.d.  |  |  |  |  |  | 0.98 (0.82, 1.17) | 0.79  |

Models 1 and 2: Best model for brain abscess in untreated patients, and all patients pre and post embolisation (for comparison, also **presented in the text**). Model 3 is presented in view of the clinical importance of the PAVM variable findings. N, number of datapoints, df degrees of freedom.

**Table S3 Bacteriological cultures and potential precipitating events in patients with brain abscesses**

|                            | Cases | Positive microbiology                                                     |
|----------------------------|-------|---------------------------------------------------------------------------|
| <b>Treatment/condition</b> |       |                                                                           |
| Scale and polish           | 3     | <i>Streptococcus milleri</i> (2 cases)                                    |
| Dental plates              | 1     | <i>Bacteroides</i> , <i>Propionibacterium</i> , <i>Actinomyces meyeri</i> |
| Dental work & fillings     | 3     | <i>Porphyromona</i> , <i>Gemella</i> , <i>Peptostreptococcus</i> (1 case) |
| Dental abscess             | 1     | G+ve cocci, G+ve rods                                                     |
| Extraction                 | 2     | nil                                                                       |
| Dental checks              | 1     | nil                                                                       |
| Poor dentition             | 2     | G+ve rods                                                                 |
| Oral radiotherapy          | 1     | nil                                                                       |
| Nasal cautery              | 1     | nil                                                                       |
| Venous access              | 1     | <i>MRSA</i> , <i>enterococcus</i>                                         |
| Otitis media               | 1     | nil                                                                       |

**Legend:** There were no data on interventional events in the 8-10 weeks prior to brain abscess in the other patients, four of whom had *Streptococcus milleri*, *Actinomyces israelii* or *bacteroides spp.* cultured from their abscess.

**Table S4: Univariate analyses of ischaemic stroke**

|                                                     | N with/without stroke | Event             | Event-free group  | P value* |
|-----------------------------------------------------|-----------------------|-------------------|-------------------|----------|
| <b>PAVM-associated variables</b>                    |                       |                   |                   |          |
| RS presentation, No. (%), %                         | 30/186                | 8 (26.7)          | 39 (21)           | 0.48     |
| SaO <sub>2</sub> , median (Q1, Q3), %               | 25/157                | 93 (85, 96)       | 94(88.5, 96)      | 0.3      |
| R-L, median (Q1, Q3), %                             | 24/105                | 11.0 (7.1, 19.5)  | 8.8 (4.7, 20.0)   | 0.32     |
| Single PAVMs†, No. (%), %                           | 29/181                | 7 (24.1)          | 44 (24.3)         | 0.99     |
| Largest f.a.d. ‡, median (Q1, Q3), mm               | 28/158                | 5.5 (4.0, 7.5)    | 5 (3.0, 6.0)      | 0.087    |
| Small (f.a.d.≤3mm), No. (%), %                      | 29/187                | 24 (82.8)         | 137 (73.3)        | 0.36     |
| <b>Non PAVM-associated variables</b>                |                       |                   |                   |          |
| Gender, No. (%), % female                           | 30/189                | 22 (73.3)         | 119 (63.0)        | 0.36     |
| Hb, median (Q <sub>1</sub> , Q <sub>3</sub> ), g/dl | 30/183                | 14.2 (12.6, 16.1) | 14.6 (12.9, 15.8) | 0.67     |
| Iron use, No. (%), %                                | 29/172                | 15 (51.7)         | 57 (33.1)         | 0.063    |
| Hormones, No. (%), %                                | 28/172                | 7 (25)            | 30 (17.4)         | 0.43     |

|                                          |        |                   |                   |      |
|------------------------------------------|--------|-------------------|-------------------|------|
| Tranexamic acid, No. (%), %              | 29/182 | 0 (0)             | 8 (4.4)           | 0.6  |
| Migraine, No. (%), %                     | 30/185 | 9 (30)            | 80 (43.2)         | 0.23 |
| Smoker§, No. (%), %                      | 30/185 | 14 (46.7)         | 86 (46.5)         | 0.99 |
| Hypertension, No. (%), %                 | 30/185 | 8 (26.7)          | 28 (15.1)         | 0.12 |
| Atrial fibrillation, No. (%), %          | 30/183 | 2 (6.7)           | 5 (2.7)           | 0.25 |
| Hypercholesterolaemia, No. (%), %        | 30/187 | 2 (6.7)           | 2 (1.1)           | 0.09 |
| Diabetes, No. (%), %                     | 30/184 | 1 (3.3)           | 6 (3.3)           | 0.99 |
| Cardiac disease, No. (%), %              | 30/187 | 3 (10)            | 6 (3.3)           | 0.11 |
| FVIII:Ag, median ( $Q_1$ , $Q_3$ ), iu/l | 15/90  | 2.01 (1.74, 2.76) | 1.79 (1.54, 2.22) | 0.12 |
| PAP mean, median ( $Q_1$ , $Q_3$ ), mmHg | 24/126 | 12 (10, 14.5)     | 13.0 (10.5, 16.0) | 0.49 |
| DVT/PE, No. (%), %                       | 28/149 | 3 (10.7)          | 13 (8.8)          | 0.86 |

**Legend:** N = number of cases with/without ischaemic stroke for which variable was measured \* significant values at false discovery rate FDR=0.05 level<sup>37</sup>, § current or former smoker

**Table S5: Anderson Gill models for ischaemic stroke**

|                                | N   | df | R <sup>2</sup> | Wald test<br>P value | Robust score<br>P value | Hazard ratio for variable (95% confidence intervals) | P value for variable in model |
|--------------------------------|-----|----|----------------|----------------------|-------------------------|------------------------------------------------------|-------------------------------|
| <b>Model 4</b> (pre emb)       | 178 | 1  | 0.036          | 6.1x10 <sup>-4</sup> | 3.20x10 <sup>-3</sup>   |                                                      |                               |
| PAP mean, mmHg                 |     |    |                |                      |                         | 0.89 (0.83, 0.95)                                    | 6.2x10 <sup>-4</sup>          |
| <b>Model 5</b> (pre +post emb) | 250 | 4  | 0.051          | 4.7x10 <sup>-5</sup> | 2.00x10 <sup>-2</sup>   |                                                      |                               |
| PAP mean, mmHg                 |     |    |                |                      |                         | 0.85 (0.79, 0.92)                                    | 5.0x10 <sup>-5</sup>          |
| Hb, g/dl                       |     |    |                |                      |                         | 0.95 (0.72, 1.27)                                    | 0.75                          |
| Embolisation                   |     |    |                |                      |                         | 5751.6 (2.5, 1.3x10 <sup>7</sup> )                   | 0.028                         |
| Hb, g/dl x Embolisation        |     |    |                |                      |                         | 1.84 (1.1, 3.07)                                     | 0.021                         |
| <b>Model 6</b> (pre emb)       | 347 | 2  | 0.001          | 0.75                 | 0.75                    |                                                      |                               |
| SaO <sub>2</sub> , %           |     |    |                |                      |                         | 0.95 (0.89, 1.00)                                    | 0.058                         |
| Largest PAVM f.a.d.            |     |    |                |                      |                         | 0.98 (0.82, 1.17)                                    | 0.79                          |

Models 4 and 5: Best models for ischaemic stroke in untreated, and all patients pre and post embolisation (for comparison, also **presented in the text**). Model 6 is presented in view of the clinical importance of the PAVM variable findings. N, number of datapoints, df degrees of freedom.
